# Supplementary material
Source: publisher figshare collection journal article supplement (https://sage.figshare.com/ndownloader/files/19793567)
Supplement: Supplementary file 1 [file 19793567]

**Supplemental Table 3: Objective Aesthetic Outcomes in Extracorporeal Septoplasty**

| Study         | Study group(s)                                          | External nose deviation angle:                                                                                                                                                        | Results                                                                        |                                                                               |                                                                          |
|---------------|---------------------------------------------------------|---------------------------------------------------------------------------------------------------------------------------------------------------------------------------------------|--------------------------------------------------------------------------------|-------------------------------------------------------------------------------|--------------------------------------------------------------------------|
|               |                                                         |                                                                                                                                                                                       | NFRA                                                                           | NLA                                                                           | NTP                                                                      |
| Jang & Kwon   | Open ECS                                                | - Preop mean I-shaped deviation 4.1° vs. postop mean 2.9°.<br>- Preop mean C shaped deviation 169.2° vs. postop mean 176.3°<br><i>P</i> < 0.03                                        | Preop mean 138.4° vs. postop mean 137.9°, <i>p</i> = 0.572                     | Preop mean 88.2° vs. postop mean 92.9°, <i>p</i> = 0.021                      | Preop mean 0.59 vs. postop mean 0.65 <i>p</i> < 0.001                    |
| Serna & Tapia | Open ECS                                                | *Percentage improvement in nasal axis angle*<br>- Mean 86% (range, 61.5–100%). <i>P</i> < 0.001                                                                                       | NR                                                                             | NR                                                                            | NR                                                                       |
| Lee & Jang    | Open ISS with adjuvant techniques vs. open ECS          | <u>Open ECS</u><br>- Preop mean I-shaped deviation 6.80° vs. postop mean 1.76° <i>p</i> < 0.001**<br>- Preop mean C shaped deviation 158.01° vs. postop mean 174.41° <i>p</i> < 0.001 | <u>Open ECS</u><br>Preop mean 138.03° vs. postop mean 136.81°, <i>p</i> = 0.04 | <u>Open ECS</u><br>Preop mean 89.81° vs. postop mean 92.27° <i>p</i> < 0.001  | <u>Open ECS</u><br>Preop mean 0.51 vs. postop mean 0.56 <i>p</i> < 0.001 |
|               |                                                         | <u>Open ISS</u><br>- Preop mean I-shaped deviation 6.25° vs. postop mean 1.58° <i>p</i> < 0.001<br>- Preop mean C shaped deviation 161.00° vs. postop mean 175.15° <i>p</i> < 0.001   | <u>Open ISS</u><br>Preop mean 138.00° vs. postop mean 136.86°, <i>p</i> = 0.03 | <u>Open ISS</u><br>Preop mean 90.36° vs. postop mean 91.88° <i>p</i> < 0.001  | <u>Open ISS</u><br>Preop mean 0.53 vs. postop mean 0.59 <i>p</i> < 0.001 |
| Loyo et al    | Open ASR                                                | - Preop mean 2.9° vs. postop mean 1.4°, <i>p</i> = 0.004                                                                                                                              | NR                                                                             | Preop mean 98.5° vs. postop mean 98.5° <i>p</i> < 0.001                       | Preop mean 0.60 vs. postop mean 0.59 <i>p</i> < 0.67                     |
| Gode et al    | Open ISS with asymmetrical spreader grafts vs. open ECS | <u>Open ECS</u><br>- Preop mean 2.42° vs. postop mean 1.48° <i>p</i> < 0.001                                                                                                          | <u>Open ECS</u><br>Preop mean 146.7° vs. postop mean 143.8°, <i>p</i> = 0.035  | <u>Open ECS</u><br>Preop mean 101.44° vs. postop mean 104.2° <i>p</i> < 0.266 | NR                                                                       |
|               |                                                         | <u>Open ISS</u><br>- Preop mean 6.23° vs. postop mean 2.13° <i>p</i> < 0.001                                                                                                          | <u>Open ISS</u><br>Preop mean 146.8° vs. postop mean 146.3°, <i>p</i> = 0.665  | <u>Open ISS</u><br>Preop mean 103.17° vs. postop mean 111° <i>p</i> < 0.001   |                                                                          |
| Unsal et al   | Open ECS without rhinoplasty                            | NR                                                                                                                                                                                    | NR                                                                             | Preop mean 93.4° ±9.3 vs. postop: 92.0° ±8.8, <i>p</i> = 0.005                | Preop mean: 0.59 ±0.05 vs. postop mean: 0.58 ±0.04, <i>p</i> = 0.002     |

\*\* Significant differences in the degree of improvement were not observed between the groups for any of the anthropometric measurements

\*\*\*As calculated according to Goode's ratio

\*\*\*\*Only a cohort of 32 patients (of 71) who had preoperative photographs and a minimum of 1-year postoperative photographs

Postop: Postoperatively

ECS: Extracorporeal septoplasty

NFRA: Nasofrontal angle

NLA: Nasolabial angle

NTP: Nasal tip projection: The angle between the nasal axis and the vertical facial axis, defined as a perpendicular line drawn midway from the interpupillary line. Difference between pre- and postoperative angles was converted into a percentage of improvement.

ISS: In-situ septoplasty

NR: Not recorded

Mth: month(s)
